# Supplementary material for: A global assessment of freshwater mollusk shell oxygen isotope signatures and their relation to precipitation and stream water
Source: PubMed Central journal article supplement (PMC6416266; doi:10.1038/s41598-019-40369-0), 2019-03-13
Supplement: 41598_2019_40369_MOESM1_ESM.pdf [file 41598_2019_40369_MOESM1_ESM.pdf]

## **SUPPLEMENTAL MATERIAL**

### **A global assessment of freshwater mollusk shell oxygen isotope signatures and their relation to precipitation and stream water**

L. Pfister<sup>1,2,\*</sup>, C. Grave<sup>3</sup>, J.-N. Beisel<sup>3,4</sup>, J.J. McDonnell<sup>5,6,7</sup>

<sup>1</sup>Luxembourg Institute of Science and Technology, Environmental Research and Innovation, Catchment and eco-hydrology research group, Esch/Alzette, Luxembourg

<sup>2</sup>University of Luxembourg, Faculty of Science, Technology and Communication, Esch/Alzette, Luxembourg

<sup>3</sup>Ecole Nationale du Génie de l'Eau et de l'Environnement de Strasbourg, Strasbourg, France

<sup>4</sup>Université de Strasbourg, CNRS, LIVE UMR 7362, Strasbourg, France

<sup>5</sup>Global Institute for Water Security, University of Saskatchewan, Saskatoon SK Canada

<sup>6</sup>School of Resources and Environmental Engineering, Ludong University, Yantai, China

<sup>7</sup>School of Geography, Earth & Environmental Sciences, University of Birmingham, Birmingham, UK

\* Corresponding author

## **Supplemental material**

### ***Biology of mollusk shells***

Mollusks have been used extensively as environmental sentinel organisms and archives – extending paleotemperature records on the basis of shell growth rates and  $\delta^{18}\text{O}$  signatures<sup>11</sup>. A limitation and source of uncertainty in the use of mollusk shell paleorecords of environmental signatures has been related to the irregular growth rates<sup>16</sup>. The shell material is produced by the mollusk's mantle as long as the environmental conditions remain favorable. In the case of excessively high or low water temperatures or water pollution, the mantle withdraws from the edges of the shell and the mollusk stops producing shell material.

As soon as shell growth resumes, a new growth band is formed and gradually covers the previous one. Darker and thinner bands are assumed to be produced during winter months<sup>17</sup>. Based on their growth bands, it is possible to estimate the age of a mollusk<sup>17</sup>. The average lifespan of freshwater mussels is largely species dependent – freshwater pearl mussels (*Margaritifera margaritifera*) living up to 200 years<sup>16,17</sup>.

### ***On $\delta^{18}\text{O}$ signatures in freshwater mollusks and their use in environmental research***

While records of isotopic signatures in precipitation are available at global scale and over many decades, historical data on stream water isotope signatures is still patchy. Similar situations of limited data on past environmental conditions are typically overcome by using tree rings or sediment layers as natural archives – leading to the reconstruction of temperature chronicles or trends in soil and air chemical composition<sup>36,37</sup>.

For overcoming the very limited availability of long stream water  $\delta^{18}\text{O}$  series, we rely here on organisms living in freshwater bodies and potentially assimilating for decades the seasonal fluctuations in  $\delta^{18}\text{O}$  of stream water. Mollusks precipitate their calcium carbonate shell in equilibrium with the surrounding water<sup>14,18,38</sup>. The oxygen isotopic composition of calcium carbonate in a mollusk's shell thus depends on water temperature (controlling the fractionation process) and water isotopic composition. As a consequence, mollusks record isotope signatures in stream water<sup>39,40</sup>.

While the results from our global assessment are encouraging, more work needs to be done on the extraction of  $\delta^{18}\text{O}$  values from mollusk shells and within-shell trends in isotopic amplitudes and averages and how this affects extracted isotope profiles from successive years<sup>18</sup>. Secondary Ion Mass Spectrometry (SIMS) may be a promising technique for future global testing of mollusks as a hydrological isotope recorder as shown by Linzmeier et al.<sup>32</sup> and Pfister et al.<sup>34</sup>.

## Sampling locations

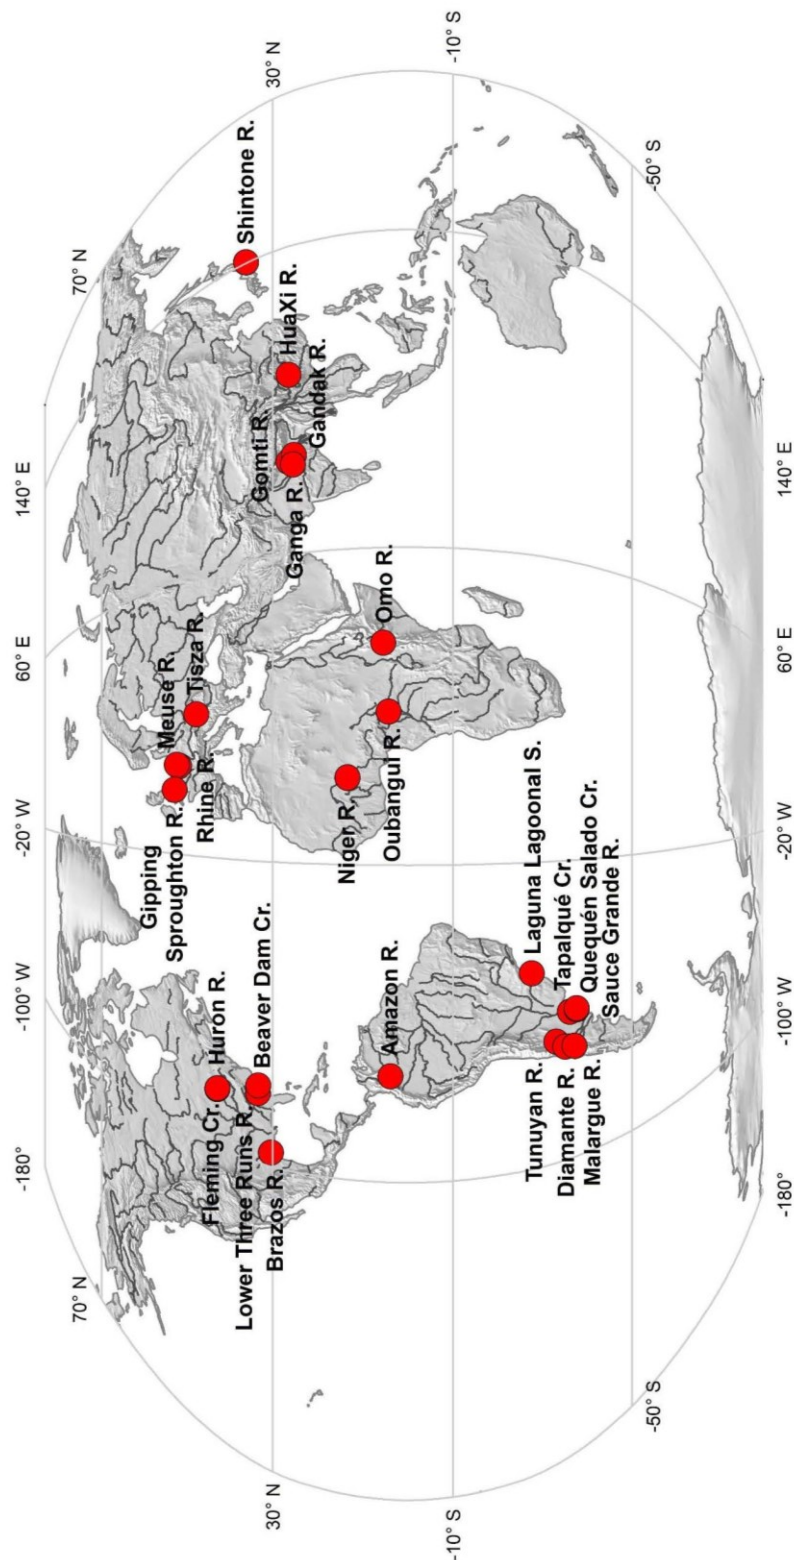

Figure S1. World map of studies on isotope signatures in freshwater mollusks. The map was created in ArcGIS version 10.5 (<http://desktop.arcgis.com/>) using free vector and raster map data [ne\_50m\_rivers\_lake\_centerlines; ne\_110m\_coastline; ne\_110m\_ocean; MSR\_50M] made available by Natural Earth (<http://naturalearthdata.com>). All maps are in the public domain (<http://www.naturalearthdata.com/about/terms-of-use/>).

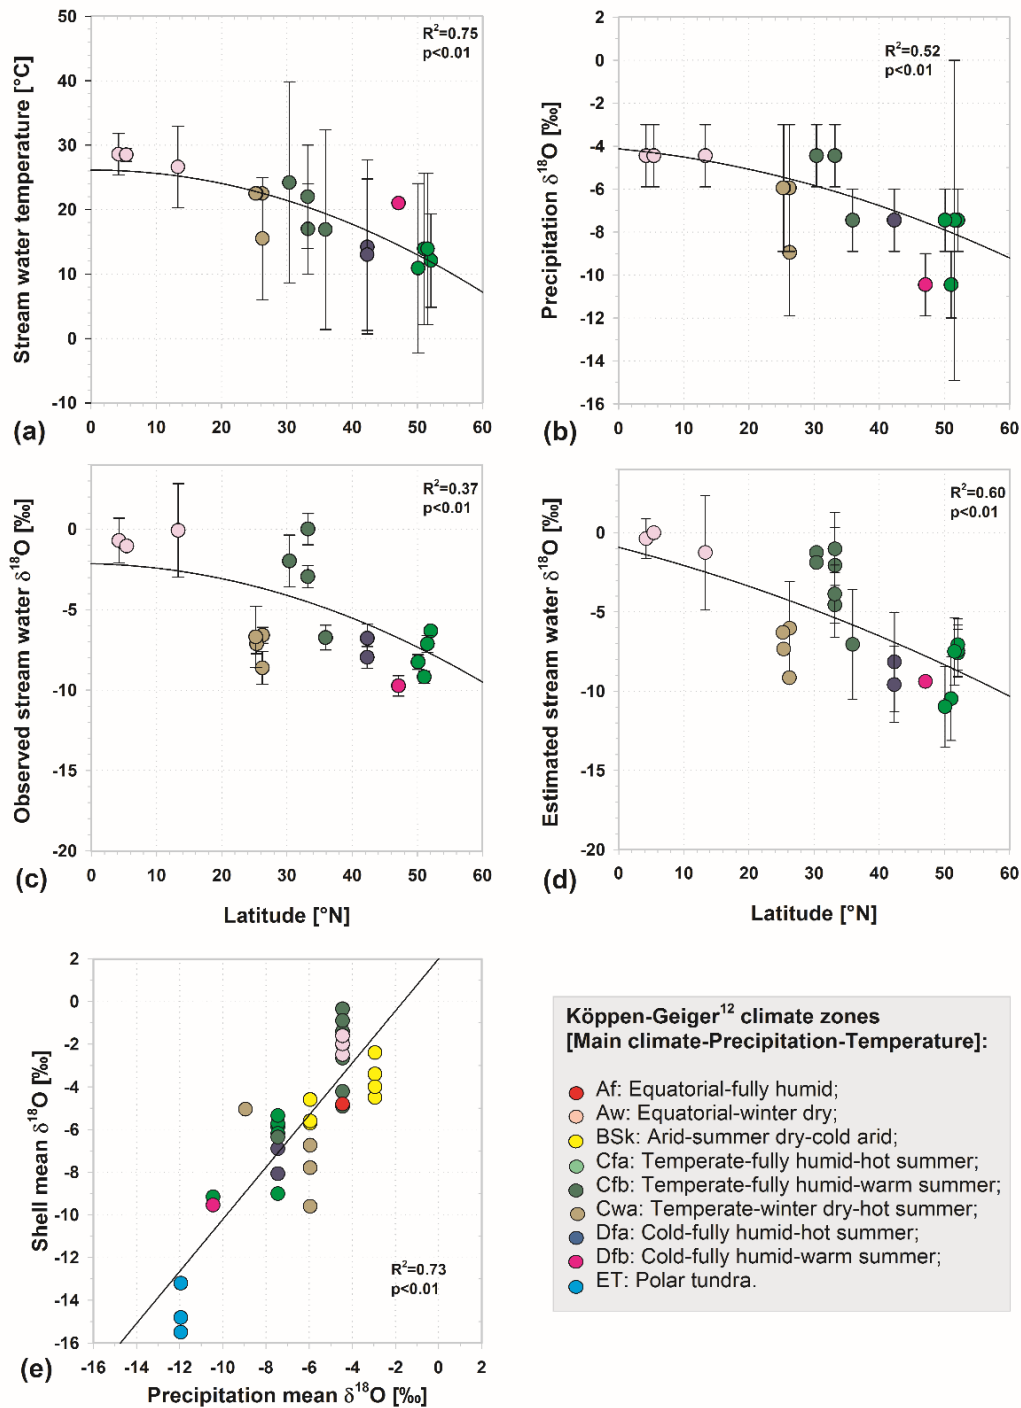

Figure S2. Latitudinal gradients in the Northern Hemisphere in (a) Stream water mean annual temperature [dots] and temperature amplitude [vertical bars], (b) mean annual  $\delta^{18}\text{O}$  values in precipitation [dots] with minimum and maximum  $\delta^{18}\text{O}$  values [vertical bars], (c)  $\delta^{18}\text{O}$  values in stream water [mean  $\delta^{18}\text{O}$  values with standard deviations], (d) mean estimated  $\delta^{18}\text{O}$  values in stream water [mean  $\delta^{18}\text{O}$  values with standard deviations]. (e) Mean annual  $\delta^{18}\text{O}$  values in precipitation vs. mean  $\delta^{18}\text{O}$  values in aragonitic bivalve shells. Shell  $\delta^{18}\text{O}$  = oxygen isotopic composition of the carbonate, expressed as a deviation in ‰ from a standard carbonate, the VPDB (Vienna PeeDee Belemnite). Precipitation and stream water  $\delta^{18}\text{O}$  = oxygen isotopic composition of the water, expressed as a deviation in ‰ from the Vienna Standard Mean Ocean Water (VSMOW).

***Inventory of mollusk shell studies, sampling sites and species specifications***

| Authors                                | Site                                   | Mollusk species                   | Class      | Stream water                           | Shell isotope data                             | Collection date                      | Shell sampling site |        |
|----------------------------------------|----------------------------------------|-----------------------------------|------------|----------------------------------------|------------------------------------------------|--------------------------------------|---------------------|--------|
|                                        |                                        |                                   |            |                                        |                                                |                                      | Lat.                | Elev.  |
| Waghorne et al. <sup>41</sup>          | Gipping Sproughton                     | <i>Bithynia tentaculata</i>       | Gastropoda | 2006-2007 (bi-monthly)                 | 15 shells                                      | 2006-2007                            | 52.06°N             | ~35 m  |
|                                        |                                        | <i>Sphaerium corneum</i>          | Bivalvia   |                                        | 10 shells                                      |                                      |                     |        |
|                                        |                                        | <i>Valvata piscinalis</i>         | Gastropoda |                                        | 10 shells                                      |                                      |                     |        |
| Versteegh et al. <sup>7</sup>          | Rhine River (Netherlands)              | <i>Unio tumidus</i>               | Bivalvia   | 1997 – 2005 (at Lobith)                | 1 shell 1996-2003                              | 2003 (Waal at Herwijnen)             | 51.55°N             | ~7 m   |
|                                        |                                        | <i>Anodonta anatina</i>           | Bivalvia   |                                        | 1 shell 1996-2003                              |                                      |                     |        |
|                                        | Meuse River (Netherlands)              | <i>Unio pictorum</i>              | Bivalvia   | 1997-2005 (at Eijden)                  | 1 shell 1997-2005                              | 2005 (near Kerkdriel)                | 51.05°N             | ~2 m   |
| Demény et al. <sup>42</sup>            | Tisza River (Hungary)                  | <i>Unio</i> sp.                   | Bivalvia   | 03/2001 - 12/2001 (every 1 to 2 weeks) | 5 shells (3 to 8 samples from each shell)      | collected 03/2001                    | 47.1°N              | 91 m   |
| Dettman et al. <sup>14</sup>           | Huron River (Michigan, USA)            | <i>Lampsilis ovata ventricosa</i> | Bivalvia   | 09/1990 - 11/1991 (twice per month)    | 1 shell 11/1990 - 05/1992 (49 samples)         | collected 06/1992 (4 years old)      | 42.33°N             | 265 m  |
|                                        | Fleming Cr. (Michigan, USA)            | <i>Alasmidonta viridis</i>        | Bivalvia   | 03/1992 - 06/1992 (twice per month)    | 1 shell 11/1990 - 05/1992 (36 samples)         | collected 10/1992 (6 years old)      | 42.30°N             | 256 m  |
| Yoshimura et al. <sup>43</sup>         | Shintone River, Honshu (Japan)         | <i>Hyriopsis</i> sp.              | Bivalvia   | 06/2005 - 12/2006 (monthly)            | 1 shell 2001 - 10/2007 (83 samples)            | Collected 25/10/2007 (7 years old)   | 35.92°N             | ~2 m.  |
| Caroll et al. <sup>20</sup>            | Lower Three Runs, South Carolina (USA) | <i>Elliptio</i>                   | Bivalvia   | 1998-2002                              | 2 shells 1998-2002 (50 samples per shell)      | collected 06/2003 (5 & 10 years old) | 33.22°N             | 63 m.  |
|                                        | Beaver Dam Creek, South Carolina (USA) | <i>Elliptio</i>                   | Bivalvia   | 1998-2002                              | 2 shells 1998-2002 (50 samples per shell)      | collected 06/2003 (12 & 6 years old) | 33.19°N             | 200 m  |
| Van Plantinga & Grossman <sup>44</sup> | Brazos River (Texas, USA)              | <i>Amblema plicata</i>            | Bivalvia   | 01/2012 – 01/2013 (weekly)             | 1 shell                                        | 09/08/2013                           | 30.37°N             | 58 m   |
|                                        |                                        | <i>Cyrtonaias tampicoensis</i>    | Bivalvia   |                                        | 1 shell                                        |                                      |                     |        |
| Yan et al. <sup>45</sup>               | HuaXi River                            | <i>Corbicula fluminea</i>         | Bivalvia   | 01.2006 – 01.2007                      | 2 shells                                       | 09.01.2007                           | 26.26°N             | 1200 m |
| Gajurel et al. <sup>10</sup>           | Gandak River (India)                   | <i>Bellamya bengalensis</i>       | Gastropoda | 2000-2001 (3 samples)                  | 1 shell (28 samples)                           | 2001                                 | 26.21°              | 67 m   |
|                                        | Gomti River (India)                    | <i>Bellamya bengalensis</i>       | Gastropoda | 2000-2001 (3 samples)                  | 5 shells (lumped values per shell)             | 08/2001                              | 25.34°N             | 74 m   |
|                                        | Ganga River (India)                    | <i>Bellamya bengalensis</i>       | Gastropoda | 2000-2004 (8 samples)                  | 1 shell (31 samples)                           | 2001                                 | 25.22°N             | 38 m   |
| Kelemen et al. <sup>9</sup>            | Niger River (Niger)                    | <i>Aspatharia dahomeyensis</i>    | Bivalvia   | 03/2011 - 03/2013 (every 2 weeks)      | 1 shell 2011-2013 (64 samples)                 | collected 04/2013 (2 years old)      | 13.31°N             | 205 m  |
|                                        | Oubangui River (Central African Rep.)  | <i>Chambardia wissmanni</i>       | Bivalvia   | 08/2009-12/2013                        | several shells 01/2010 - 12/2012 (181 samples) | collected 03/2013                    | 4.21°N              | 369 m  |

Table S1: Studies on isotope signatures in stream water and aragonitic shells of freshwater bivalves.

| Authors                               | Site                                                | Mollusk species                     | Class      | Stream water              | Shell isotope data             | Collection date      | Shell sampling site |            |
|---------------------------------------|-----------------------------------------------------|-------------------------------------|------------|---------------------------|--------------------------------|----------------------|---------------------|------------|
|                                       |                                                     |                                     |            |                           |                                |                      | Lat.                | Elev.      |
| Vonhof et al. <sup>46</sup>           | Omo River (Kenya)                                   | <i>Etheria elliptica</i>            | Bivalvia   | 08/2004                   | 1 shell (~29 samples)          | 2003 (2 years old)   | 5.41°N              | 381 m      |
| Kaandorp et al. <sup>22</sup>         | Amazon River (Peru)                                 | <i>Anodontites trapesialis</i>      | Bivalvia   | 09/1998-10/1999           | 09/1998 - 10/1999 (26 samples) | collected 21/10/1999 | 3.75°S              | 106 m      |
| Colonese et al. <sup>47</sup>         | Laguna Lagoonal System (Brazil)                     | <i>Anomalocardia flexuosa</i>       | Bivalvia   | 08/2008-08/2009           | 2 shells (44 samples)          | 2007                 | 27.5°S              | ~1 m       |
| De Francesco and Hassan <sup>48</sup> | Northwestern Mendoza (Tunuyán River)                | <i>Chilina mendozana</i>            | Gastropoda | Panarello & Dapeña (1996) | 17 shells                      | ~2012                | 33-37°S             | ~900-1200m |
|                                       |                                                     | <i>Heleobia hatcheri</i>            | Gastropoda |                           |                                |                      |                     |            |
|                                       | Central-eastern Mendoza (Diamante and Atuel Rivers) | <i>Heleobia kuesteri</i>            | Gastropoda | Vogel et al. (1975)       |                                |                      |                     |            |
|                                       |                                                     | <i>Heleobia parchappii</i>          | Gastropoda |                           |                                |                      |                     |            |
|                                       | Southern Mendoza (Atuel and Malargue Rivers)        | <i>Lymnaea viator</i>               | Gastropoda | Ostera & Dapeña (2003)    |                                |                      |                     |            |
|                                       |                                                     | <i>Pisidium chiquitanum</i>         | Bivalvia   |                           |                                |                      |                     |            |
| Bonadonna et al. <sup>49</sup>        | Arroyo Tapalqué                                     | <i>Chilina sp., Littoridina sp.</i> | Gastropoda | 17/10/93                  | 3 shells                       | ~1993                | 36°S-37.5°S         | ~40m       |
|                                       | Arroyo Quequén Salado                               |                                     |            | 28/10/93<br>19/03/92      | 3 + 2 shells                   |                      | 37.5°S              | ~10m       |
|                                       | Sauce Grande                                        |                                     |            | 22/10/93                  | 3 + 2 shells                   |                      | 37.5°S              | ~140m      |

Table S1: Studies on isotope signatures in stream water and aragonitic shells of freshwater bivalves (continued).

| River                   | Köppen climate zones | Precipitation   | Stream water                   |    |     |             |                           |      |      | Shell                     |      |      | Reconstructed stream water |                |
|-------------------------|----------------------|-----------------|--------------------------------|----|-----|-------------|---------------------------|------|------|---------------------------|------|------|----------------------------|----------------|
|                         |                      |                 | Temperature [°C]               |    |     |             | $\delta^{18}\text{O}$ [‰] |      |      | $\delta^{18}\text{O}$ [‰] |      |      | $\delta^{18}\text{O}$ [‰]  |                |
|                         |                      |                 | Mean $\delta^{18}\text{O}$ [‰] | T° | n   | $\sigma$    | Min / Max                 | Mean | n    | $\sigma$                  | Mean | n    | $\sigma$                   | Mean           |
| Gipping R.              | Cfb                  | -8.90 to -6.00  | 12.1                           | 12 | 5.4 | 5 / 19.5    | -6.33                     | 6    | 0.14 | -5.88                     | 15   | 0.30 | -7.59                      | -6.14 / -9.11  |
| Gipping R.              | Cfb                  | -8.90 to -6.00  | 12.1                           | 12 | 5.4 | 5 / 19.5    | -6.33                     | 6    | 0.14 | -5.72                     | 10   | 0.41 | -7.43                      | -5.87 / -9.06  |
| Gipping R.              | Cfb                  | -8.90 to -6.00  | 12.1                           | 12 | 5.4 | 5 / 19.5    | -6.33                     | 6    | 0.14 | -5.35                     | 10   | 0.40 | -7.06                      | -5.51 / -8.68  |
| Meuse R.                | Cfb                  | -8.90 to -6.00  | 13.9                           | 71 | 6.7 | 2.5 / 26    | -7.13                     | 104  | 0.52 | -6.18                     | 42   | 0.62 | -7.50                      | -5.49 / -9.61  |
| Rhine R.                | Dfc, Cfb             | -14.9 to -6.00  | 13.9                           | 49 | 7.0 | 2.5 / 26    | -9.19                     | 26   | 0.39 | -9.16                     | 80   | 1.09 | -10.48                     | -7.94 / -13.12 |
| Tisza R.                | Dfb                  | -11.90 to -9.00 | 21.0*                          | 1  | -   | -           | -9.74                     | 95   | 0.64 | -9.54                     | 5    | 0.38 | -9.39                      | -              |
| Huron R.                | Dfa to Dfb           | -8.90 to -6.00  | 14.2                           | 34 | 9.2 | 2 / 29      | -6.79                     | 23   | 0.89 | -6.90                     | 41   | 1.06 | -8.16                      | -5.22 / -11.28 |
| Fleming Cr.             | Dfa to Dfb           | -8.90 to -6.00  | 13.0                           | 32 | 7.9 | 2 / 25.5    | -7.97                     | 18   | 0.67 | -8.07                     | 13   | 0.63 | -9.58                      | -7.31 / -11.99 |
| Shintone R.             | Cfa                  | -8.90 to -6.00  | 16.9                           | 60 | 9.0 | 2 / 33      | -6.74                     | 19   | 0.77 | -6.36                     | 83   | 1.51 | -7.05                      | -3.74 / -10.52 |
| Lower Three Runs        | Cfa                  | -5.90 to -3.00  | 17.0                           | 43 | 5.0 | 9 / 23      | ~0                        | 43   | 0.97 | -1.4                      | 53   | 1.34 | -2.07                      | 0.29 / -4.48   |
| Lower Three Runs        | Cfa                  | -5.90 to -3.00  | 17.0                           | 43 | 5.0 | 9 / 23      | ~0                        | 43   | 0.97 | -0.35                     | 43   | 1.23 | -1.02                      | 1.23 / -3.32   |
| Beaver Dam Cr.          | Cfa                  | -5.90 to -3.00  | 22.0                           | 44 | 5.0 | 13 / 29     | -2.95                     | 44   | 0.68 | -4.91                     | 26   | 1.04 | -4.56                      | -2.55 / -6.62  |
| Beaver Dam Cr.          | Cfa                  | -5.90 to -3.00  | 22.0                           | 44 | 5.0 | 13 / 29     | -2.95                     | 44   | 0.68 | -4.22                     | 59   | 0.81 | -3.87                      | -2.09 / -5.70  |
| Brazos R.               | Cfa                  | -5.90 to -3.00  | 24.2                           | 20 | 7.6 | 6.7 / 37.8  | -1.98                     | 20   | 1.61 | -2.03                     | 14   | 0.70 | -1.25                      | -0.55 / -1.95  |
| Brazos R.               | Cfa                  | -5.90 to -3.00  | 24.2                           | 20 | 7.6 | 6.7 / 37.8  | -1.98                     | 20   | 1.61 | -2.66                     | 17   | 0.36 | -1.88                      | -1.52 / -2.24  |
| HuaXi R.                | Cwa to Cwb           | -11.9 to -6.00  | 15.5                           | 53 | 5.6 | 6 / 25      | -6.60                     | 51   | 0.50 | -5.05                     | 34   | 1.74 | -6.03                      | -3.14 / -8.99  |
| Gandak R.               | Cwa to Cwb           | -8.90 to -3.00  | 22.5                           | 2  | -   | 15 / 32     | -8.63                     | 3    | 1.02 | -9.6                      | 28   | 0.76 | -9.15                      | -              |
| Ganga R.                | Cwa to Cwb           | -8.90 to -3.00  | 22.5                           | 2  | -   | 15 / 32     | -7.13                     | 8    | 1.91 | -7.79                     | 31   | 1.09 | -6.29                      | -              |
| Gomti R.                | Cwa to Cwb           | -8.90 to -3.00  | 22.5                           | 2  | -   | 15 / 32     | -6.7                      | 3    | 0.61 | -6.74                     | 5    | 0.96 | -7.34                      | -              |
| Niger R.                | Aw to Bsh            | -5.90 to -3.00  | 26.6                           | 50 | 3.7 | 18.5 / 31.1 | -0.08                     | 50   | 2.91 | -2.49                     | 64   | 2.89 | -1.25                      | 2.34 / -4.85   |
| Oubangui R.             | Aw                   | -5.90 to -3.00  | 28.6                           | 91 | 1.2 | 25.1 / 31.5 | -0.71                     | 111  | 1.40 | -1.99                     | 181  | 1.01 | -0.37                      | 0.86 / -1.61   |
| Omo R.                  | Aw to As             | -5.90 to -3.00  | 28.5                           | 2  | -   | 27.5 / 29.5 | -1.05                     | 2    | -    | -1.61                     | 29   | 0.78 | -0.01                      | -              |
| Amazon R.               | Af                   | -5.90 to -3.00  | 27.6                           | 23 | 1.6 | 25 / 31.2   | -4.37                     | 23   | 4.01 | -4.81                     | 57   | 3.01 | -3.38                      | -0.07 / -6.70  |
| Laguna Lagoonal System  | Cfa                  | -5.90 to -3.00  | 21.0                           | 25 | 3.9 | 14 / 30     | -2.50                     | 104  | 1.52 | -1.6                      | -    | 0.4  | -0.66                      | -0.26 / -1.06  |
| Laguna Lagoonal System  | Cfa                  | -5.90 to -3.00  | 21.0                           | 25 | 3.9 | 14 / 30     | -2.50                     | 104  | 1.52 | -0.9                      | 44   | 0.6  | 0.04                       | 0.64 / -0.56   |
| North-Western Mendoza   | ET                   | -14.90 to -9.00 | 5.4*                           | 2  | -   | -           | -17.77                    | 3    | 1.83 | -14.81                    | 9    | 1.32 | -18.01                     | -              |
| Central-Eastern Mendoza | ET                   | -14.90 to -9.00 | 8.8*                           | 6  | -   | -           | -17.30                    | 1    | -    | -15.50                    | 1    | -    | -17.92                     | -              |
| Southern Mendoza        | ET                   | -14.90 to -9.00 | 12.9*                          | 3  | -   | -           | -15.40                    | 1    | -    | -13.20                    | 1    | -    | -14.73                     | -              |
| Tapalqué Cr.            | BSk                  | -5.90 to 0.00   | -                              | -  | -   | -           | -4.29                     | 1    | -    | -4.50                     | 1    | -    | -                          | -              |
| Quequén Salado R.       | BSk                  | -5.90 to 0.00   | -                              | -  | -   | -           | -4.41                     | 2    | -    | -3.40                     | 1    | -    | -                          | -              |
| Quequén Salado R.       | BSk                  | -5.90 to 0.00   | -                              | -  | -   | -           | -4.41                     | 2    | -    | -4.00                     | 1    | -    | -                          | -              |
| Quequén Salado R.       | BSk                  | -5.90 to 0.00   | -                              | -  | -   | -           | -4.41                     | 2    | -    | -2.40                     | 1    | -    | -                          | -              |
| Sauce Grande R.         | BSk                  | -8.90 to -3.00  | -                              | -  | -   | -           | -5.07                     | 1    | -    | -4.60                     | 1    | -    | -                          | -              |
| Sauce Grande R.         | BSk                  | -8.90 to -3.00  | -                              | -  | -   | -           | -5.07                     | 1    | -    | -5.70                     | 1    | -    | -                          | -              |
| Sauce Grande R.         | BSk                  | -8.90 to -3.00  | -                              | -  | -   | -           | -5.07                     | 1    | -    | -5.60                     | 1    | -    | -                          | -              |

Table S2: River basins, Köppen-Geiger climate zones (as per Rubel & Kottek<sup>12</sup>), Range in precipitation  $\delta^{18}\text{O}$  (as per Terzer et al.<sup>50</sup>), Mean annual stream water temperature (except for values marked with an asterisk, taken from Scheibler et al.<sup>31</sup>), Mean values and standard deviations of  $\delta^{18}\text{O}$  in stream water and aragonitic bivalve shells, Mean values with upper and lower bounds (for  $1\sigma$  in water temperature and shell  $\delta^{18}\text{O}$ ) of reconstructed stream water  $\delta^{18}\text{O}$ . n = number of observations.

| <b>Authors</b>                         | <b>Shell analyses</b>                                               | <b>Isotope data source and extraction</b>                                                                                                        |
|----------------------------------------|---------------------------------------------------------------------|--------------------------------------------------------------------------------------------------------------------------------------------------|
| Waghorne et al. <sup>41</sup>          | Crushed shell,<br>Mass spec. analyses                               | Average and standard deviation values directly taken from text (no raw data provided in article).                                                |
| Versteegh et al. <sup>7</sup>          | Shell growth bands,<br>Micromill,<br>Mass spec. analyses            | Meuse River: Stream water (article Figure 4) and shell isotope data (article Figure 11-B) extracted via PlotDigitizer.                           |
|                                        |                                                                     | Rhine River: Stream water (article Figure 4) and shell isotope data (article Figure 12-B) extracted via PlotDigitizer.                           |
| Demény et al. <sup>42</sup>            | Shell growth bands,<br>Dental drill,<br>Mass spec. analyses         | Stream water taken from Table 3 and shell isotope data (article Figure 1) extracted via PlotDigitizer.                                           |
| Dettman et al. <sup>14</sup>           | Shell growth bands,<br>Micromill,<br>Mass spec. analyses            | Huron River: Stream water (article Figure 2) and shell isotope data (article Figure 5) extracted via PlotDigitizer.                              |
|                                        |                                                                     | Fleming Creek: Stream water (article Figure 2) and shell isotope data (article Figure 6) extracted via PlotDigitizer.                            |
| Yoshimura et al. <sup>43</sup>         | Shell growth bands,<br>Dental drill,<br>Mass spec. analyses         | Stream water (article Figure 3) and shell isotope data (article Figure 5) extracted via PlotDigitizer.                                           |
| Caroll et al. <sup>20</sup>            | Shell growth bands,<br>Micromill,<br>Mass spec. analyses            | Lower Three Runs: Stream water (article Figure 4) and shell isotope data (article appendix) extracted via PlotDigitizer.                         |
|                                        |                                                                     | Beaver Dam Creek: Stream water (article Figure 4) and shell isotope data (article appendix) extracted via PlotDigitizer.                         |
| Van Plantinga & Grossman <sup>44</sup> | Shell growth bands,<br>Micromill,<br>Mass spec. analyses            | Stream water isotope data and temperatures extracted via PlotDigitizer (article Figure 3A). Shell isotope data taken from Table 3.               |
| Yan et al. <sup>45</sup>               | Shell growth bands,<br>Scalpel blade,<br>Mass spec. analyses        | HuaXi River: Stream water temperature and isotope data (article Figure 3) and shell isotope data (article Figure 4) extracted via PlotDigitizer. |
| Gajurel et al. <sup>10</sup>           | Crushed shells & growth bands,<br>Micromill,<br>Mass spec. analyses | Gandak River: Stream water isotope data taken from article Table 2 and shell isotope data taken from article Table 4.                            |
|                                        |                                                                     | Gomti River: Stream water isotope data taken from article Table 2 and shell isotope data taken from Table 3.                                     |
|                                        |                                                                     | Ganga River: Stream water isotope data taken from article Table 2 and shell isotope data (article Figure 9) extracted via PlotDigitizer.         |
| Kelemen et al. <sup>9</sup>            | Shell growth bands,<br>Micromill,<br>Mass spec. analyses            | Niger River: Stream water (article Figure 2) and shell isotope data (Appendix; Shell N37B) extracted via PlotDigitizer.                          |
|                                        |                                                                     | Oubangui River: Stream water (article Figure 2) and shell isotope data (article Figure 6) extracted via PlotDigitizer.                           |
| Vonhof et al. <sup>46</sup>            | Shell growth bands,<br>Micromill,<br>Mass spec. analyses            | Omo River: Stream water taken from article Table 2 and shell isotope data (article Figure 4) extracted via PlotDigitizer.                        |
| Kaandorp et al. <sup>22</sup>          | Shell growth bands,<br>Micromill,<br>Mass spec. analyses            | Amazon River: Stream water taken from article Table 1 and shell isotope data taken from article Table 2.                                         |
| Colonese et al. <sup>47</sup>          | Shell growth bands,<br>Micromill,<br>Mass spec. analyses            | Stream water taken from article discussion section and shell isotope data taken from article results section 3.4.                                |
| De Francesco & Hassan <sup>48</sup>    | Crushed shells,<br>Mass spec. analyses                              | North-western Mendoza: stream water isotope data taken from Panarello & Dapeña (1996) and shell isotope data taken from article Table 4.         |
|                                        |                                                                     | Central Eastern Mendoza: stream water and shell isotope data from article Table 4.                                                               |
|                                        |                                                                     | Southern Mendoza: stream water and shell isotope data from article Table 4.                                                                      |
| Bonadonna et al. <sup>49</sup>         | Crushed shells,<br>Mass spec. analyses                              | Stream water taken from Table 2 and shell isotope data taken from Table 1.                                                                       |

Table S3: Shell material analyses techniques and stream water and shell isotope data sources for the 15 selected studies.



## References

- <sup>7</sup>Versteegh, E., Troelstra, S., Vonhof, H. & Kroon, D. Oxygen isotope composition of bivalve seasonal growth increments and ambient water in the rivers Rhine and Meuse. *PALAIOS* **24**, 497-504 (2009).
- <sup>9</sup>Kelemen Z. et al. Calibration of hydroclimate proxies in freshwater bivalve shells from Central and West Africa. *Geochimica et Cosmochimica Acta* **208**, 41-62 (2017).
- <sup>10</sup>Gajurel, A.P., France-Lanord, C., Huyghe, P., Guilmette, C. & Gurung, D. C and O isotope compositions of modern fresh-water mollusc shells and river waters from the Himalaya and Ganga plain. *Chemical Geology* **233**, 156-183 (2006).
- <sup>11</sup>Urey, H.C. The thermodynamic properties of isotopic substances. *Journal of the Chemical Society*, 562-581 (1947).
- <sup>12</sup>Rubel, F. & Kottek, M. Observed and projected climate shifts 1901–2100 depicted by world maps of the Köppen-Geiger climate classification. *Meteorologische Zeitschrift* **19**, 135-141 (2010).
- <sup>14</sup>Dettman, D.L., Reische, A.K. & Lohmann, K.C. Controls on the stable isotope composition of seasonal growth bands in aragonitic fresh-water bivalves (unionidae). *Geochimica et Cosmochimica Acta* **63**, 1049-1057 (1999).
- <sup>16</sup>Anthony, J.L., Kesler, D.H., Downing, W.L. & Downing, J.A. Length-specific growth rates in freshwater mussels (Bivalvia: Unionidae): extreme longevity or generalized growth cessation? *Freshwater Biology* **46**, 1349-1359 (2001).
- <sup>17</sup>Dunca, E., Söderberg, H. & Norrgrann, O. Shell growth and age determination in the freshwater pearl mussel *Margaritifera margaritifera* in Sweden: natural versus limed streams. *Ferrantia* **64**, 48-58 (2011).
- <sup>18</sup>Goodwin, D.H., Schöne, B.R. & Dettman, D.L. Resolution and fidelity of oxygen isotopes as paleotemperature proxies in bivalve mollusk shells: models and observations. *PALAIOS* **18**, 110-125 (2003).
- <sup>20</sup>Caroll, M., Romanek, C. & Paddock, L. The relationship between the hydrogen and oxygen isotopes of freshwater bivalve shells and their home streams. *Chemical Geology* **234**, 211-222 (2006).
- <sup>22</sup>Kaandorp, R.J.G. Seasonal stable isotope variations of the modern Amazonian freshwater bivalve *Anodontites trapesialis*. *Palaeogeography, Palaeoclimatology, Palaeoecology* **194**, 339-354 (2003).
- <sup>31</sup>Scheibler, E.E., Claps, M.C. & Roig-Juñent, S.A. Temporal and altitudinal variations in benthic macroinvertebrate assemblages in an Andean river basin of Argentina. *Journal of Limnology* **73**, 92-108 (2014).
- <sup>32</sup>Linzmeier, B. J., Kozdon, R., Peters, S.E. & Valley, J.W. Oxygen isotope variability within Nautilus shell growth bands. *PLoS ONE* **11**, e0153890 (2016).
- <sup>34</sup>Pfister, L. et al. Freshwater pearl mussels as a stream water stable isotope recorder. *Ecohydrology*, e2007 (2018).
- <sup>36</sup>Carrer, M. Individualistic and time-varying tree-ring growth to climate sensitivity. *PLoS ONE* **6**, e22813 (2011).
- <sup>37</sup>Aymerich, I.F., Oliva, M., Giralt, S. & Martín-Herrero, J. Detection of tephra layers in Antarctic sediment cores with hyperspectral imaging. *PLoS ONE* **11**, e0146578 (2016).

- <sup>38</sup>Schöne, B.R., Goodwin, D.H., Flessa, K.W., Dettman, D.L. & Roopnarine, P.D. Sclerochronology and growth of the bivalve mollusks *Chione (Chionista) fluctifraga* and *Chione (Chionista) cortezi* in the Gulf of California, Mexico. *Veliger* **45**, 45–54 (2002).
- <sup>39</sup>Krantz, D.E., Williams, D.F. & Jones, D.S. Ecological and paleoenvironmental information using stable isotope profiles from living and fossil molluscs. *Palaeogeography, Palaeoclimatology, Palaeoecology* **58**, 249–266 (1987).
- <sup>40</sup>Yan, H., Chen, J. & Xiao, J. A review on bivalve shell, a tool for reconstruction of paleoclimate and paleo-environment. *Chinese Journal of Geochemistry* **33**, 310–315 (2014).
- <sup>41</sup>Waghorne, R., Hancock, J.D.R. & Candy, I. Environmental controls on the  $\delta^{18}\text{O}$  composition of freshwater calcite and aragonite in a temperate, lowland river system: significance for palaeoclimatic studies. *Proceedings of the Geologists' Association* **123**, 576–583 (2012).
- <sup>42</sup>Demény, A. et al. Stable isotope compositions and trace element concentrations in freshwater bivalve shells (*Unio* sp.) as indicators of environmental changes at Tiszapüspöki, eastern Hungary. *Central European Geology* **55**, 441–460 (2012).
- <sup>43</sup>Yoshimura, T., Nakashima, R., Suzuki, A., Tomioka, N. & Kawahata, H. Oxygen and carbon isotope records of cultured freshwater pearl mussel *Hyriopsis* sp. shell from Lake Kasumigaura, Japan. *Journal of Paleolimnology* **43**, 437–448 (2015).
- <sup>44</sup>Van Plantinga, A.A. & Grossman, E. Stable and clumped isotope sclerochronologies of mussels from the Brazos River, Texas (USA): Environmental and ecologic proxy. *Chemical Geology* **502**, 55–65 (2018).
- <sup>45</sup>Yan, H., Lee, X., Zhou, H., Cheng, H., Peng, Y. & Zhou, Z. Stable isotope composition of the modern freshwater bivalve *Corbicula fluminea*. *Geochemical Journal* **43**, 379–387 (2009).
- <sup>46</sup>Vonhof, H.B. et al. Environmental and climatic control on seasonal stable isotope variation of freshwater molluscan bivalves in the Turkana Basin (Kenya). *Palaeogeography, Palaeoclimatology, Palaeoecology* **383–384**, 16–26 (2013).
- <sup>47</sup>Colonese, A.C. et al. Shell sclerochronology and stable isotopes of the bivalve *Anomalocardia flexuosa* (Linnaeus, 1767) from southern Brazil: Implications for environmental and archaeological studies. *Palaeogeography, Palaeoclimatology, Palaeoecology* **484**, 7–21 (2017).
- <sup>48</sup>De Francesco, C.G. & Hassan, G.S. Stable isotope composition of freshwater mollusk shells from central-western Argentina. *Revista Brasileira de Paleontologia* **16**, 213–224 (2013).
- <sup>49</sup>Bonadonna, F.P., Leone, G. & Zanchetta, G., 1999. Stable isotope analyses on the last 30 ka molluscan fauna from Pampa grassland, Bonaerense region, Argentina. *Palaeogeography, Palaeoclimatology, Palaeoecology* **153**, 289–308 (1999).
- <sup>50</sup>Terzer, S., Wassenaar, L.I., Araguás-Araguás, L.J. & Aggarwal, P.K. Global isoscapes for  $\delta^{18}\text{O}$  and  $\delta^2\text{H}$  in precipitation: improved prediction using regionalized climatic regression models. *Hydrology and Earth System Sciences* **17**, 4713–4728 (2013).
